# Supplementary material
Source: PubMed Central journal article supplement (PMC7250164)
Supplement: NIHMS1570843-supplement-3.pdf [file NIHMS1570843-supplement-3.pdf]

**Supplemental Table S1. Patient demographics.**

| Variable                                  |                     | Number or Mean<br>(SEM) |
|-------------------------------------------|---------------------|-------------------------|
| <b>Condition</b>                          |                     |                         |
|                                           | Non-cancer controls | 16                      |
|                                           | PDAC                | 20                      |
| <b>Sex</b>                                |                     |                         |
| Non-cancer controls                       |                     |                         |
|                                           | Male                | 5                       |
|                                           | Female              | 11                      |
|                                           |                     |                         |
| PDAC                                      | Male                | 10                      |
|                                           | Female              | 10                      |
| <b>Age</b>                                |                     |                         |
|                                           | Non-cancer controls | 57.6 (2.92)             |
|                                           | PDAC                | 67.8 (1.96)**           |
| <b>BMI</b>                                |                     |                         |
|                                           | Non-cancer controls | 29.31 (1.31)            |
|                                           | PDAC                | 27.02 (1.13)            |
| <b>Neoadjuvant Therapy</b>                |                     |                         |
|                                           | Yes                 | 5                       |
|                                           | No                  | 15                      |
| <b>Tumor size.</b>                        |                     |                         |
|                                           | <3cm                | 11                      |
|                                           | >3cm                | 9                       |
| <b>AJCC Stage 7<sup>th</sup></b>          |                     |                         |
|                                           | IA                  | 1                       |
|                                           | IIA                 | 6                       |
|                                           | IIB                 | 12                      |
|                                           | III                 | 1                       |
| <b>Tumor Differentiation <sup>#</sup></b> |                     |                         |
|                                           | Well/moderate       | 12                      |
|                                           | Poor                | 7                       |
| <b>N Stage</b>                            |                     |                         |
|                                           | N0                  | 7                       |
|                                           | N1                  | 13                      |
| <b>Lymphovascular Invasion</b>            |                     |                         |
|                                           | Yes                 | 14                      |
|                                           | No                  | 6                       |

Groups were compared using Mann-Whitney U test.

\*\* Significantly different ( $P<0.01$ )

<sup>#</sup> One adenosquamous cancer patient excluded from the analysis of tumor differentiation

**Supplemental Table S2. Demographics of non-cancer control patients with normal muscularity and cachectic PDAC patients.**

| Variable                                |                                                        | Number or Mean (SEM) |
|-----------------------------------------|--------------------------------------------------------|----------------------|
| <b>Condition</b>                        |                                                        |                      |
|                                         | Non-cancer controls (normal muscularity <sup>#</sup> ) | 9                    |
|                                         | Cachectic PDAC <sup>§</sup>                            | 9                    |
| <b>Sex</b>                              |                                                        |                      |
| Non-cancer controls                     | Male                                                   | 3                    |
|                                         | Female                                                 | 6                    |
| Cachectic PDAC                          | Male                                                   | 3                    |
|                                         | Female                                                 | 6                    |
| <b>Age</b>                              |                                                        |                      |
|                                         | Non-cancer controls                                    | 54.1 (11.86)         |
|                                         | Cachectic PDAC <sup>§</sup>                            | 72.3 (5.34)**        |
| <b>Skeletal muscle index (SMI)</b>      |                                                        |                      |
|                                         | Non-cancer controls                                    | 48.6 (8.39)          |
|                                         | Cachectic PDAC <sup>§</sup>                            | 35.4 (4.75)****      |
| <b>Skeletal muscle attenuation (MA)</b> |                                                        |                      |
|                                         | Non-cancer controls                                    | 37.8 (9.58)          |
|                                         | Cachectic PDAC <sup>§</sup>                            | 24.1 (10.34)*        |
| <b>Body-weight loss</b>                 |                                                        |                      |
|                                         | Non-cancer controls                                    | 1.6 (3.71)           |
|                                         | Cachectic PDAC <sup>§</sup>                            | 18.3 (7.88)***       |
| <b>BMI</b>                              |                                                        |                      |
|                                         | Non-cancer controls                                    | 30.4 (6.70)          |
|                                         | Cachectic PDAC <sup>§</sup>                            | 25.9 (4.75)          |
| <b>Neoadjuvant Therapy (PDAC)</b>       |                                                        |                      |
|                                         | Yes                                                    | 3                    |
|                                         | No                                                     | 6                    |

Groups were compared using Mann-Whitney U test.

\* $P < 0.05$ , \*\* $P < 0.01$ , \*\*\* $P < 0.001$ , \*\*\*\* $P < 0.0001$ , significantly different vs. non-cancer control group.

<sup>#</sup>Normal muscularity was defined based on CT-defined measurements of skeletal muscle index (SMI), and sex- and BMI-specific thresholds for SMI values.

<sup>§</sup> Cachexia was defined as body-weight loss of  $>8\%$  in combination with CT-defined measurements of muscle depletion (low SMI) and low muscle attenuation, based on sex- and BMI-specific thresholds (Martin et al, 2013).
